# Supplementary material
Source: MDPI journal article supplement (https://www.mdpi.com/2504-5377/7/2/28)

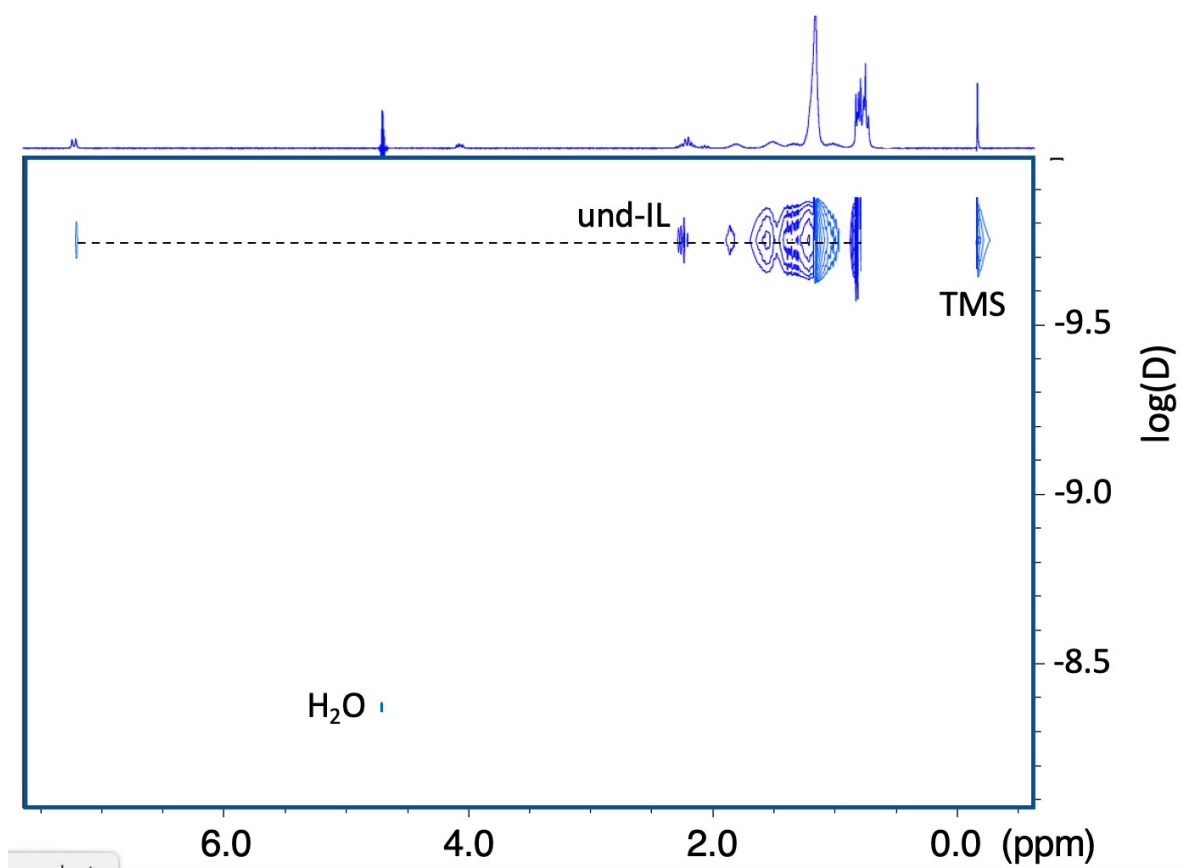

**Figure S1.** DOSY spectrum of a mixture containing 50 mM und-IL at pH 10.

Supplement: s1 [file s1 › colloids-2283536-Supplementary.pdf]
